# Supplementary material for: Enhancing the sensitivity of a water stable MOF as a H2S gas sensor by the fabrication of a mixed-matrix membrane
Source: Royal Society of Chemistry journal article supplement (doi:10.1039/d3ma00681f), 2023-01-01
Supplement: d3ma00681f1.pdf [file d3ma00681f1.pdf]

## Supporting Information

---

### **Enhancing the Sensitivity of a Water Stable MOF as a H<sub>2</sub>S Gas Sensor by the Fabrication of Mixed-Matrix Membrane**

Mouli Das Dawn,<sup>a</sup> Karabi Nath,<sup>a</sup> Subhajit Saha<sup>a</sup>, Pritam Kumar Roy,<sup>b</sup> Mahitosh Mandal<sup>b</sup> and Kumar Biradha<sup>\*, a</sup>

<sup>a</sup> Department of Chemistry, Indian Institute of Technology Kharagpur, Kharagpur 721302, India

\*E-mail: [kbiradha@chem.iitkgp.ac.in](mailto:kbiradha@chem.iitkgp.ac.in)

Fax: +91-3222- 282252. Tel.: +91-3222-283346.

<sup>b</sup> School of Medical Science and Technology, Indian Institute of Technology, Kharagpur 721302, India

# Contents

1. General aspects
2. **Section S1:** Synthesis of ligand
3. **Section S2:** Synthesis of MOFs
4. **Section S3:** Membrane Preparation
5. **Section S4:** Pertinent crystallographic parameters of MOFs
6. **Section S5:** IR spectra of Zn-cpb, Zn-bdc and Zn-btc
7. **Section S6:** XRPD patterns of MOFs
8. **Section S7:** Thermogravimetric Analysis
9. **Section S8:** UV-visible absorbance spectra of MOFs
10. **Section S9:** Photoluminescence spectra
11. **Section S10:** Characterization of H<sub>2</sub>S-treated material
12. **Section S11:** Real water specimen investigation
13. **Section S12:** Gaseous phase H<sub>2</sub>S detection in powder form
14. **Section S13:** Fluorescence spectra of MOF loading membrane
15. **Section S14:** Effect of H<sub>2</sub>S on the ligand
16. **Section S15:** Colorimetric response of the MOF and its thin-film toward the H<sub>2</sub>S study
17. **Section S16:** Geometrical parameters of hydrogen bonds
18. **Section S17:** Cytotoxicity assay analysis
19. **Section S18:** Comparison table of the various existing MOFs for the sensing of H<sub>2</sub>S

### **General aspects:**

All the chemicals and solvents such as Fumaric acid, 3-picolyl amine, triphenyl phosphite, Sodium sulfide,  $\text{Zn}(\text{NO}_3)_2 \cdot 6\text{H}_2\text{O}$ , Polyvinylpyrrolidone, Poly(vinylidene fluoride) pyridine, and DMF were purchased from local chemical suppliers and used without purification. The XRPD patterns were recorded with a BRUKER-AXS-D8-ADVANCE diffractometer at room temperature. The diffuse reflectance spectra (DRS) were recorded with a Cary model 5000 UV–vis–near-infrared (NIR) spectrophotometer. The solid-state luminescence spectra were collected with a Spex Fluorolog-3 (model FL3-22) spectrofluorimeter. FTIR spectra were recorded with a PerkinElmer Instrument spectrum Rx Serial No. 73713. The TGA data had been recorded with a PerkinElmer instrument, Pyris Diamond TG/DTA under a nitrogen atmosphere at a heating rate of 10 °C/min. Field-emission scanning electron microscopy (FESEM) was performed on a ZEISS VP 300 instrument with an Oxford EDS detector, operated at an accelerating voltage of 5–10 kV. The solution state luminescence spectra were collected with a Shimadzu RF-6000 spectrofluorophotometer. The solution state absorbance spectra were recorded with the use of a Shimadzu (model no. UV2450) UV–vis spectrophotometer. Fluorescence lifetimes were measured using a time-correlated single photon counting (TCSPC) spectrometer of IBH (U.K.). X-ray photoelectron spectroscopy (XPS) was performed in an ESCALAB Xi, Thermo-Scientific, UK, having a monochromatic Al  $\text{K}\alpha$  X-ray source (1486.6 eV). The CAE (constant analyzer energy) for survey spectra is 100 eV and that for high-resolution spectra is 50 eV.

## Synthesis and Experimental methods:

### Section S1: Synthesis of Ligand (BP3YF):

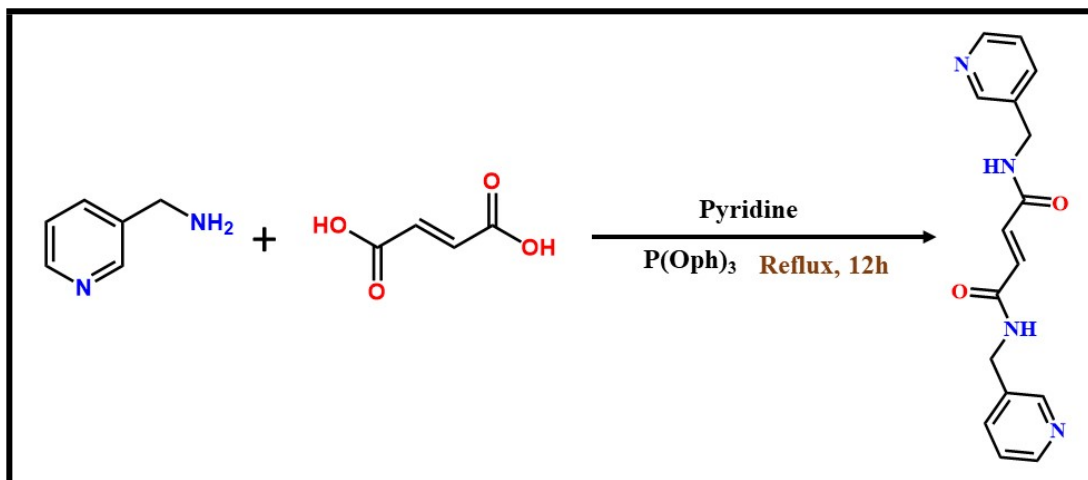

Scheme S1

(BP3YF)

Ligand BP3YF was prepared by following the reported procedure.<sup>S1</sup>

### <sup>1</sup>H-NMR spectrum of 3-PAFA in d<sub>6</sub>-DMSO

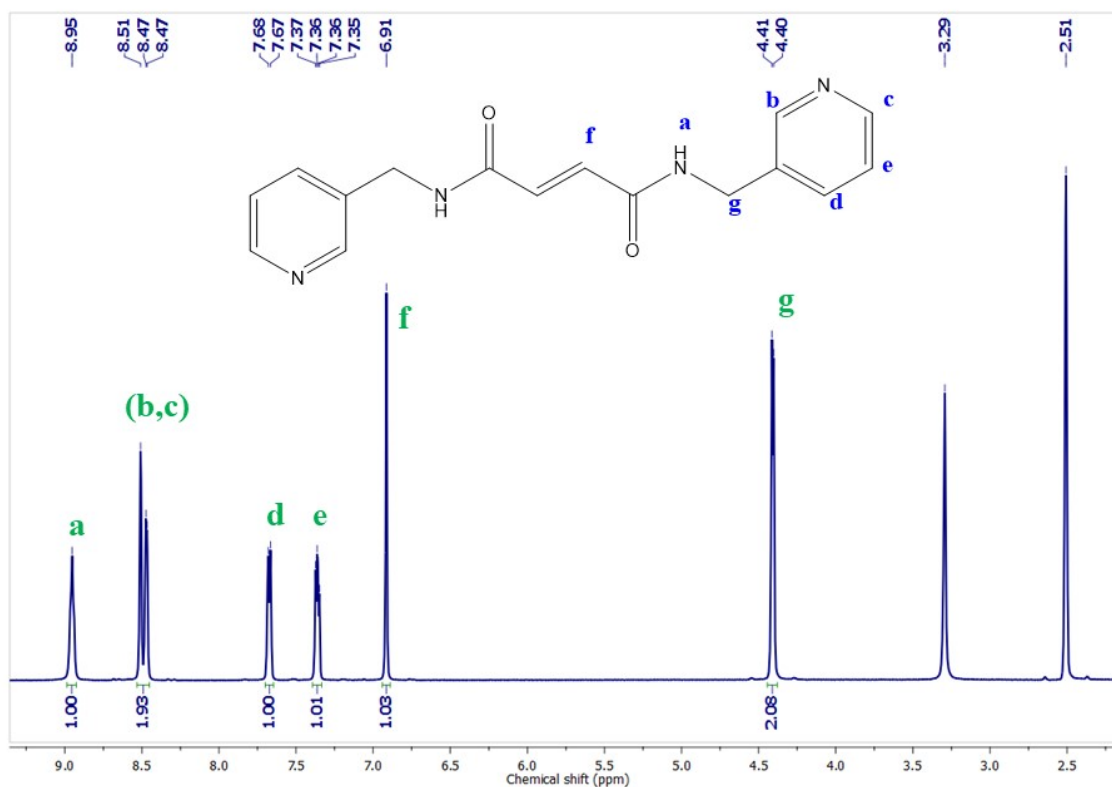

## Section S2: Synthesis of MOFs (**Zn-cpb**, **Zn-bdc** and **Zn-btc**)

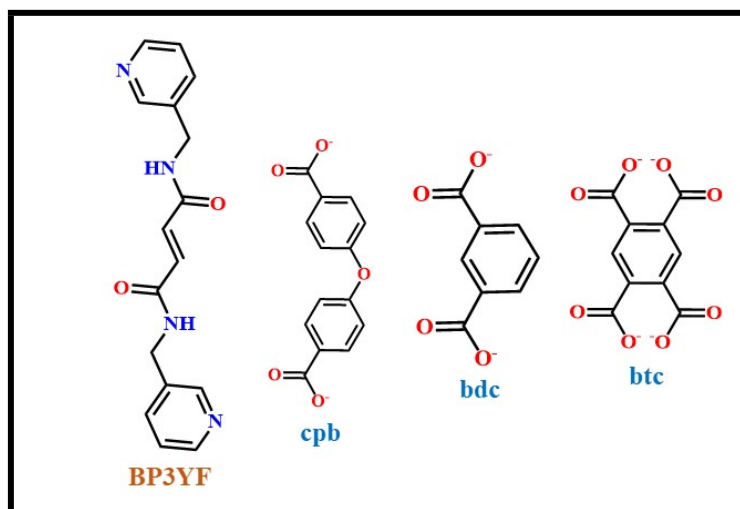

**Scheme S2.** Chemical structures of ligand and ancillary ligands.

### 1. Synthesis of **Zn-cpb**: {[Zn(BP3YF)(cpb)]}<sub>n</sub>

A mixture of **BP3YF** (29.6 mg, 0.1 mmol), sodium oxybisbenzoate (14mg, 0.1 mmol) and Zn(NO<sub>3</sub>)<sub>2</sub> (29.7 mg, 0.1 mmol) were taken in a sealed glass tube along with 8 ml of DMF-water. The mixture was heated at 100 °C for 2 days and slowly cooled to room temperature. Colorless block shaped crystals of **Zn-cpb** were obtained, which were then washed with water several times and dried in air. Yield: 68%. Elemental anal. Calcd for C<sub>30</sub>H<sub>24</sub>N<sub>4</sub>O<sub>7</sub>Zn (%): C, 58.31; H, 3.91; N, 9.07. Obsd (%): C, 58.52; H, 3.64; N, 8.67.

### 2. Synthesis of **Zn-bdc**: {[Zn(BP3YF)(bdc)]}<sub>n</sub>

A mixture of **BP3YF** (29.6 mg, 0.1 mmol), sodium isophthalate (10 mg, 0.1 mmol) and Zn(NO<sub>3</sub>)<sub>2</sub> (29.7 mg, 0.1 mmol) was taken in a sealed glass tube along with 8 ml of DMF-water. The mixture was heated at 100 °C for 2 days and plate shaped crystals of **Zn-bdc** appeared upon slow cooling to room temperature. The crystals were washed properly with water and dried in air. Yield: 72%. Elemental anal. Calcd for C<sub>24</sub>H<sub>20</sub>N<sub>4</sub>O<sub>6</sub>Zn (%): C, 54.82; H, 3.83; N, 10.65. Obsd (%): C, 53.96; H, 3.80; N, 10.58.

### 3. Synthesis of **Zn-btc**: {[Zn<sub>2</sub>(BP3YF)(btc)(H<sub>2</sub>O)<sub>2</sub>]}<sub>n</sub>

A mixture of **BP3YF** (29.6 mg, 0.1 mmol), sodium pyromellitate (15 mg, 0.1 mmol) and Zn(NO<sub>3</sub>)<sub>2</sub> (29.7 mg, 0.1 mmol) were taken in a sealed glass tube along with 8 ml of DMF-water. The mixture was heated at 100 °C for 2 days and slowly cooled to room temperature. The crystals were washed properly with water and dried in air. Yield: 72%. Elemental anal.

Calcd for C<sub>13</sub>H<sub>11</sub>N<sub>2</sub>O<sub>6</sub>Zn (%): C, 43.81; H, 3.11; N, 7.86. Obsd (%): C, 43.62; H, 3.03; N, 7.94.

## **Section S3**

### **Membrane Preparation**

In this study, the composite membranes were fabricated by a slurry-casting method. The microcrystalline powder of **Zn-bdc** was mixed with PVDF for the corresponding composite membrane, and the amount of **Zn-bdc** was 0, 20, 40, and 60 wt % in membranes **Zn-bdc\_0@PVDF**, **Zn-bdc\_20@PVDF**, **Zn-bdc\_40@PVDF**, and **Zn-bdc\_60@PVDF** respectively. A similar procedure was utilized for the preparation of all composite membranes; in a typical preparation process of **Zn-bdc\_60@PVDF**, 60 mg of **Zn-bdc** microcrystals were ultrasonically dispersed in DMF (4 mL) for 30 min to produce a suspension, PVDF powders were added to the suspension, and the mixture was stirred at room temperature for 45 min to obtain a homogeneous jelly. This homogeneous jelly was poured onto a petri-dish, which was dried at 100 °C for 8 h to remove DMF. The solidified membrane was removed from the petri-dish, washed with deionized water, and dried at 120 °C under vacuum to eliminate residual solvent prior to further experimental measurements.

## **Section S4: Pertinent crystallographic parameters of MOFs**

**Crystal Structure Determination.** All the single-crystal data were collected on a Bruker-APEX-II CCD X-ray diffractometer using graphite monochromated Mo K $\alpha$  radiation ( $\lambda = 0.71073 \text{ \AA}$ ) at room temperature (100 K), by the hemisphere method. The structures were solved by direct methods and refined by least-squares methods on F<sup>2</sup> using SHELX-2014.<sup>50</sup> Nonhydrogen atoms were refined anisotropically, and hydrogen atoms were fixed at calculated positions and refined using a riding model. The H atoms attached to the O atom or N atoms are located wherever possible and refined using the riding model.

**Table S1****Crystallographic parameters of Zn-cpb, Zn-bdc and Zn-btc**

| <b>Compound<br/>(CCDC No.)</b>                        | <b>Zn-btc<br/>(2282228)</b>                                               | <b>Zn-cpb<br/>(2282229)</b>                                                 | <b>Zn-bdc<br/>(2282230)</b>                                                 |
|-------------------------------------------------------|---------------------------------------------------------------------------|-----------------------------------------------------------------------------|-----------------------------------------------------------------------------|
| <b>Formula</b>                                        | C <sub>13</sub> H <sub>11</sub> N <sub>2</sub> O <sub>6</sub> Zn          | C <sub>30</sub> H <sub>24</sub> N <sub>4</sub> O <sub>7</sub> Zn            | C <sub>24</sub> H <sub>20</sub> N <sub>4</sub> O <sub>6</sub> Zn            |
| <b>MW</b>                                             | 356.38                                                                    | 617.92                                                                      | 525.83                                                                      |
| <b>Temperature (K)</b>                                | 293(2)                                                                    | 293(2)                                                                      | 302(2)                                                                      |
| <b>Crystal system</b>                                 | Triclinic                                                                 | Triclinic                                                                   | Monoclinic                                                                  |
| <b>Space group</b>                                    | P-1                                                                       | P-1                                                                         | P21/c                                                                       |
| <b>a (Å)</b>                                          | 6.139(5)                                                                  | 10.7634(2)                                                                  | 13.130(4)                                                                   |
| <b>b (Å)</b>                                          | 8.638(2)                                                                  | 11.1742(2)                                                                  | 10.419(3)                                                                   |
| <b>c (Å)</b>                                          | 12.092(3)                                                                 | 12.6382(2)                                                                  | 16.247(5)                                                                   |
| <b>α (deg)</b>                                        | 84.001(7)                                                                 | 78.282(4)                                                                   | 90                                                                          |
| <b>β (deg)</b>                                        | 84.561(8)                                                                 | 69.923(4)                                                                   | 90.526(11)                                                                  |
| <b>γ (deg)</b>                                        | 87.900(7)                                                                 | 82.799(4)                                                                   | 90                                                                          |
| <b>V (Å<sup>3</sup>)</b>                              | 634.6(3)                                                                  | 1395.3(3)                                                                   | 2222.52                                                                     |
| <b>Z</b>                                              | 2                                                                         | 2                                                                           | 4                                                                           |
| <b>d (g/cm<sup>3</sup>)</b>                           | 1.866                                                                     | 1.471                                                                       | 1.571                                                                       |
| <b>F(000)</b>                                         | 358                                                                       | 632                                                                         | 1072                                                                        |
| <b>Crystal size/mm<sup>3</sup></b>                    | 0.4 x 0.39 x 0.40                                                         | 0.26 x 0.2 x 0.08                                                           | 0.3 x 0.29 x 0.25                                                           |
| <b>Radiation</b>                                      | MoK $\alpha$                                                              | MoK $\alpha$                                                                | MoK $\alpha$                                                                |
| <b>Index ranges</b>                                   | -6 $\leq$ h $\leq$ 7,<br>-10 $\leq$ k $\leq$ 11<br>-15 $\leq$ l $\leq$ 14 | -15 $\leq$ h $\leq$ 15,<br>-15 $\leq$ k $\leq$ 15<br>-15 $\leq$ l $\leq$ 18 | -16 $\leq$ h $\leq$ 15,<br>-12 $\leq$ k $\leq$ 12<br>-19 $\leq$ l $\leq$ 20 |
| <b>2<math>\Theta</math> range for data collection</b> | 1.70° to 26.98°                                                           | 1.74° to 31.03°                                                             | 2.32° to 25.99°                                                             |
| <b><math>\mu</math>(mm<sup>-1</sup>)</b>              | 1.970                                                                     | 0.935                                                                       | 1.156                                                                       |
| <b>Reflections collected</b>                          | 7654                                                                      | 18844                                                                       | 23442                                                                       |
| <b>Independent reflections</b>                        | 2654                                                                      | 7265                                                                        | 4155                                                                        |
| <b>Data/restraints/parameters</b>                     | 2654/0/205                                                                | 7265/0/379                                                                  | 4155/2/316                                                                  |
| <b>Goodness-of-fit on F<sup>2</sup></b>               | 0.941                                                                     | 2.181                                                                       | 1.750                                                                       |
| <b>R<sub>1</sub> (I&gt;2<math>\sigma</math>(I))</b>   | 0.0377                                                                    | 0.0744                                                                      | 0.132                                                                       |
| <b>Final R indexes [all data]<br/>wR2 (all data)</b>  | 0.1124                                                                    | 0.1494                                                                      | 0.3141                                                                      |
| <b>Largest diff. peak and hole</b>                    | 1.292 and -0.632<br>e.Å <sup>-3</sup>                                     | 2.751 and -0.702<br>e.Å <sup>-3</sup>                                       | 1.631 and -0.947<br>e.Å <sup>-3</sup>                                       |

**Table S2**  
**Bond Distances (Å) and Bond Angles (°) for Zn-cpb, Zn-bdc, and Zn-btc.**

| <b>Zn-cpb</b>        |                     | <b>Zn-bdc</b> |                     | <b>Zn-btc</b> |                     |
|----------------------|---------------------|---------------|---------------------|---------------|---------------------|
| <b>Bond</b>          | <b>Distance (Å)</b> | <b>Bond</b>   | <b>Distance (Å)</b> | <b>Bond</b>   | <b>Distance (Å)</b> |
| <b>Zn1-O1A</b>       | 1.992(4)            | Zn1-O3A       | 1.945(7)            | Zn1-O3        | 2.080(4)            |
| <b>Zn1-O1B</b>       | 2.536(4)            | Zn1-O1A       | 1.953(6)            | Zn1-O9        | 2.078(4)            |
| <b>Zn1-O2B</b>       | 1.972(5)            | Zn1-N11A      | 2.056(8)            | Zn1-N1        | 2.070(4)            |
| <b>Zn1-N11A</b>      | 2.056(7)            | Zn1-N21A      | 2.075(8)            | Zn1-O5        | 2.003(4)            |
| <b>Zn1-N11B</b>      | 2.069(5)            |               |                     | Zn1-O6        | 2.010(4)            |
|                      |                     |               |                     |               |                     |
| <b>Bonds</b>         | <b>Angle(°)</b>     | <b>Bonds</b>  | <b>Angle(°)</b>     | <b>Bonds</b>  | <b>Angle(°)</b>     |
| <b>O1A-Zn1-N11A</b>  | 101.8(2)            | O3A-Zn1-N11A  | 113.5(3)            | O3 Zn1 O9     | 169.4(1)            |
| <b>O1A-Zn1-N11B</b>  | 94.6(2)             | O3A-Zn1-O1A   | 94.4(3)             | O3 Zn1 N1     | 102.8(1)            |
| <b>O1A-Zn1-O1B</b>   | 168.4(2)            | O3A-Zn1-N21A  | 114.4(3)            | O3 Zn1 O5     | 85.3(1)             |
| <b>O1A-Zn1-O2B</b>   | 111.4(2)            | N11A-Zn1-O1A  | 116.8(3)            | O3 Zn1 O6     | 87.1(1)             |
| <b>N11A-Zn1-N11B</b> | 102.7(2)            | N11A-Zn1-N21A | 102.6(3)            | O9 Zn1 N1     | 87.4(1)             |
| <b>N11A-Zn1-O1B</b>  | 85.8(2)             | O1A-Zn1-N21A  | 115.8(3)            | O9 Zn1 O5     | 87.5(1)             |
| <b>N11A-Zn1-O2B</b>  | 124.7(2)            |               |                     | O9 Zn1 O6     | 94.8(1)             |
| <b>N11B-Zn1-O1B</b>  | 92.1(2)             |               |                     | N1 Zn1 O5     | 115.9(1)            |
| <b>N11B-Zn1-O2B</b>  | 116.6(2)            |               |                     | N1 Zn1 O6     | 97.2(1)             |
| <b>O1B-Zn1-O2B</b>   | 57.1(2)             |               |                     | O5 Zn1 O6     | 146.9(1)            |
| <b>N11B-Zn1-O1A</b>  | 94.6(2)             |               |                     | O6 Zn1 N1     | 97.2(1)             |
|                      |                     |               |                     | O5 Zn1 N1     | 115.9(1)            |



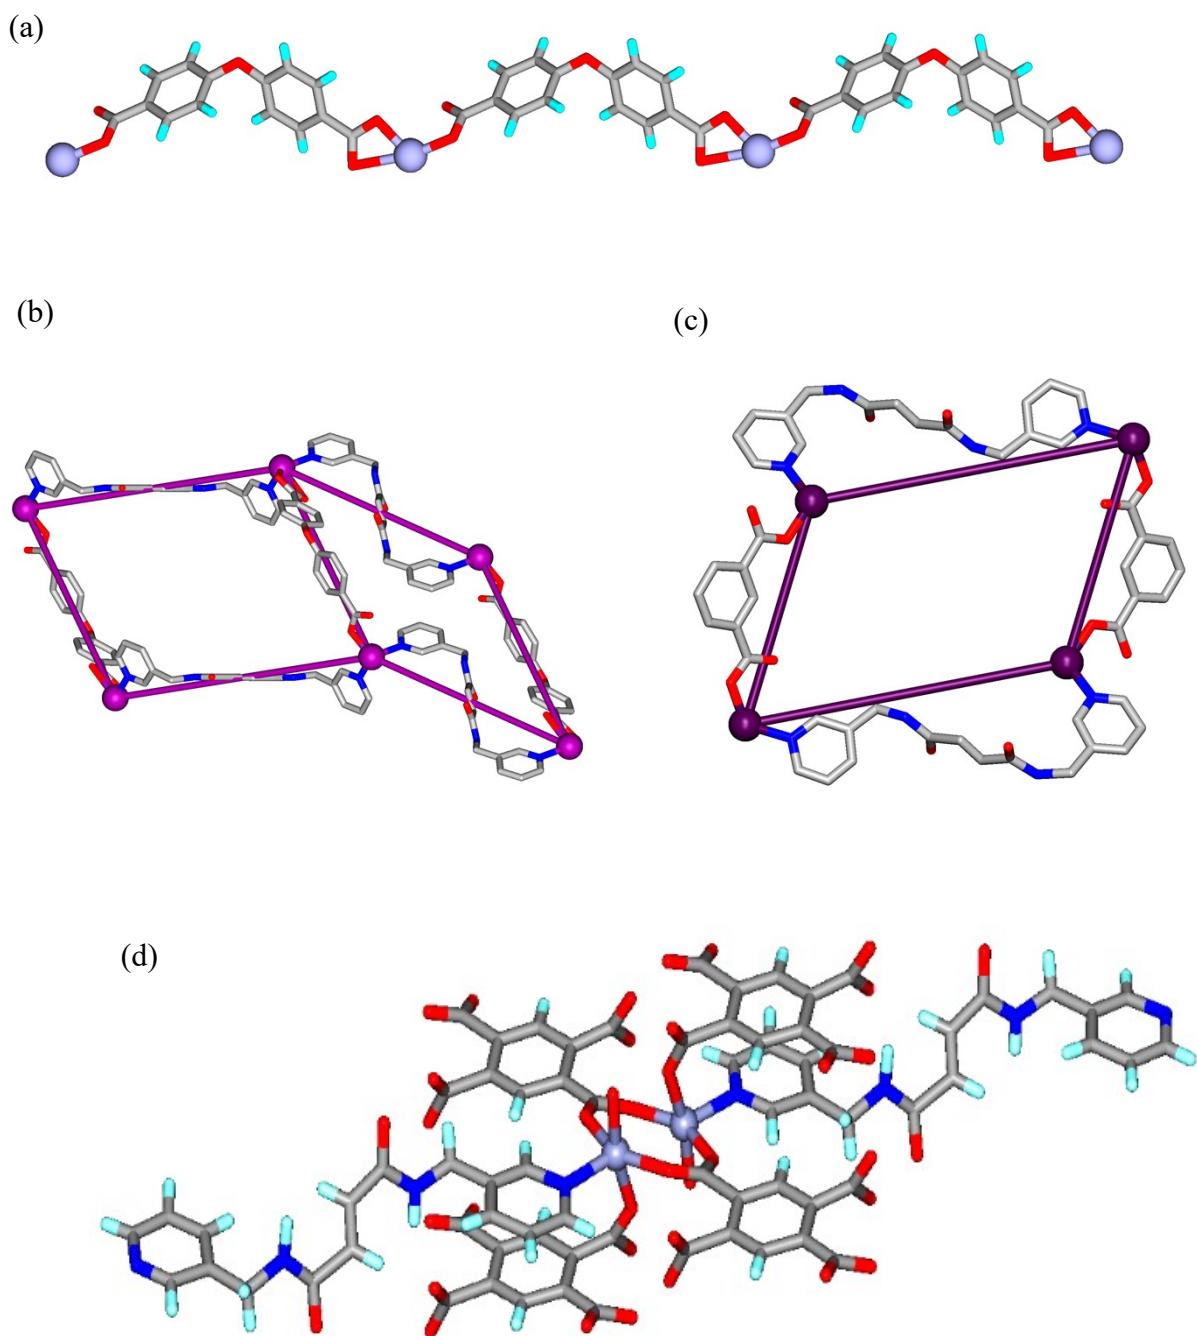

**Figure S1** Illustrations for the crystal structure of **Zn-cpb**, **Zn-bdc** and **Zn-btc**: a) Coordination environment around the central metal ion Zn(II) in **Zn-cpb** (b) Formation of rectangular and square cavities through **BP3YF** and **cpb** moieties (c) Formation of rectangular cavities through **BP3YF** and **bdc** moieties (d) Distorted trigonal bipyramidal geometry around Zn(II) in **Zn-btc**.

## Section S5: IR spectra of Zn-cpb, Zn-bdc and Zn-btc

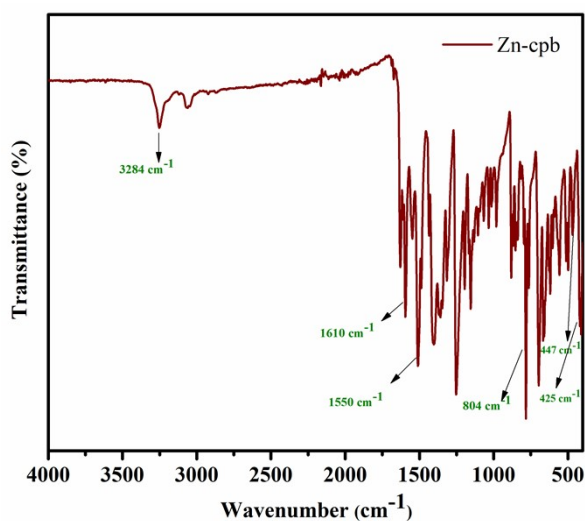

**Figure S2: IR spectrum of Zn-cpb:** 3284 (N-H stretch), 1610 (amide C=O stretch), 1550 (amide II), 804 cm<sup>-1</sup> (Zn-O symmetric stretching), 447 cm<sup>-1</sup> (Zn-O symmetric stretching), 425 cm<sup>-1</sup> (Zn-N symmetric stretching)

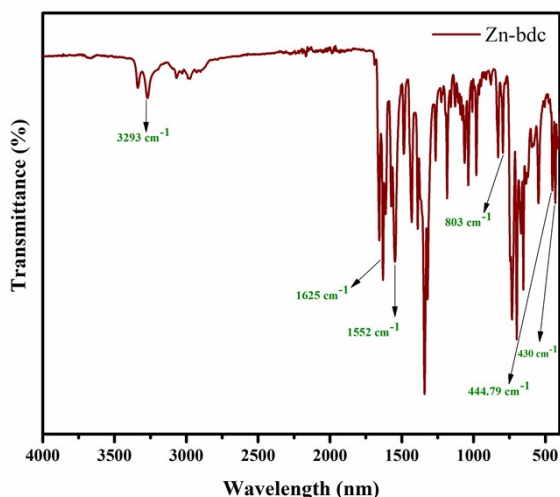

**Figure S3: IR spectrum of Zn-bdc:** 3293 (N-H stretch), 1625 (amide C=O stretch), 1552 (amide II), 803 cm<sup>-1</sup> (Zn-O symmetric stretching), 444.79 cm<sup>-1</sup> (Zn-O symmetric stretching), 430 cm<sup>-1</sup> (Zn-N symmetric stretching)

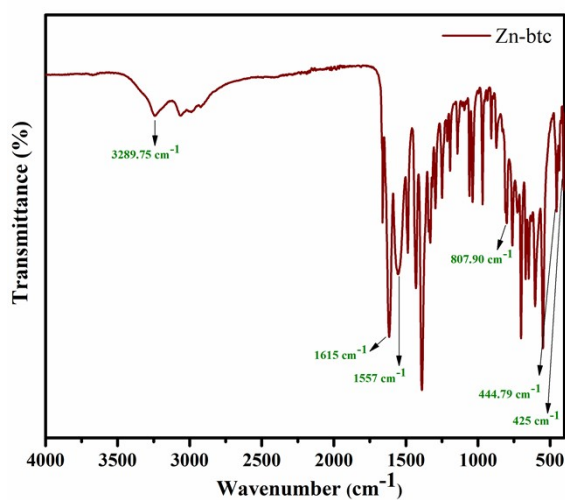

**Figure S4: IR spectrum of Zn-btc:** 3289.75 (N-H stretch), 1615 (amide C=O stretch), 1557 (amide II), 807.90 cm<sup>-1</sup> (Zn-O symmetric stretching), 444.79 cm<sup>-1</sup> (Zn-O symmetric stretching), 425 cm<sup>-1</sup> (Zn-N symmetric stretching).

## Section S6: XRPD Pattern of Zn-cpb, Zn-bdc and Zn-btc

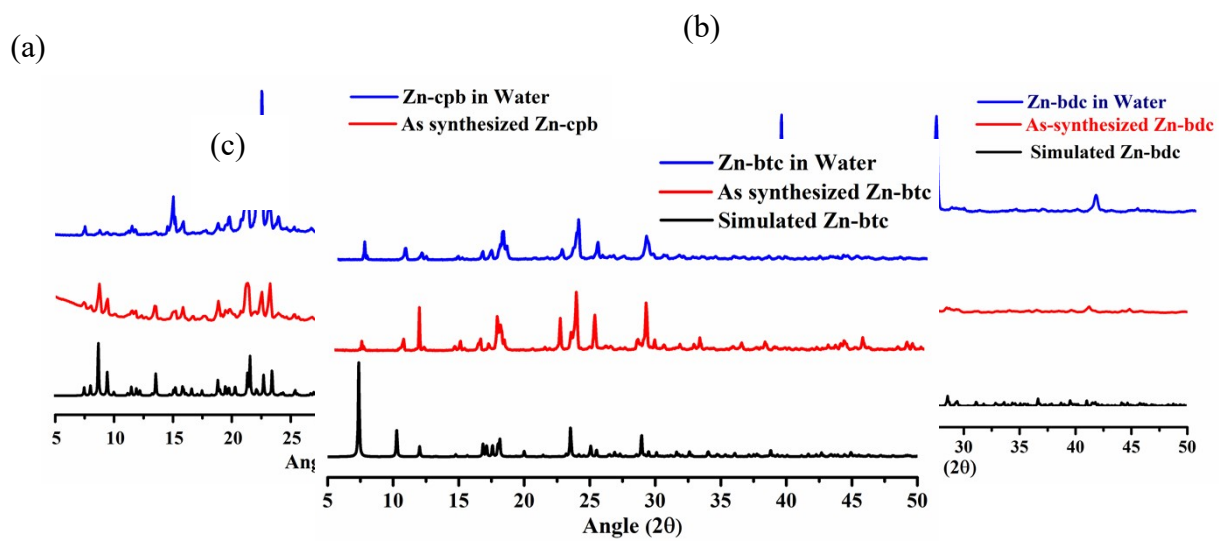

Figure S5. XRPD-pattern of MOFs to check its bulk purity as well as its aqueous stability (a) Zn-cpb, (b) Zn-bdc, (c) Zn-btc

## Section S7: Thermogravimetric Analysis of Zn-cpb, Zn-bdc and Zn-btc

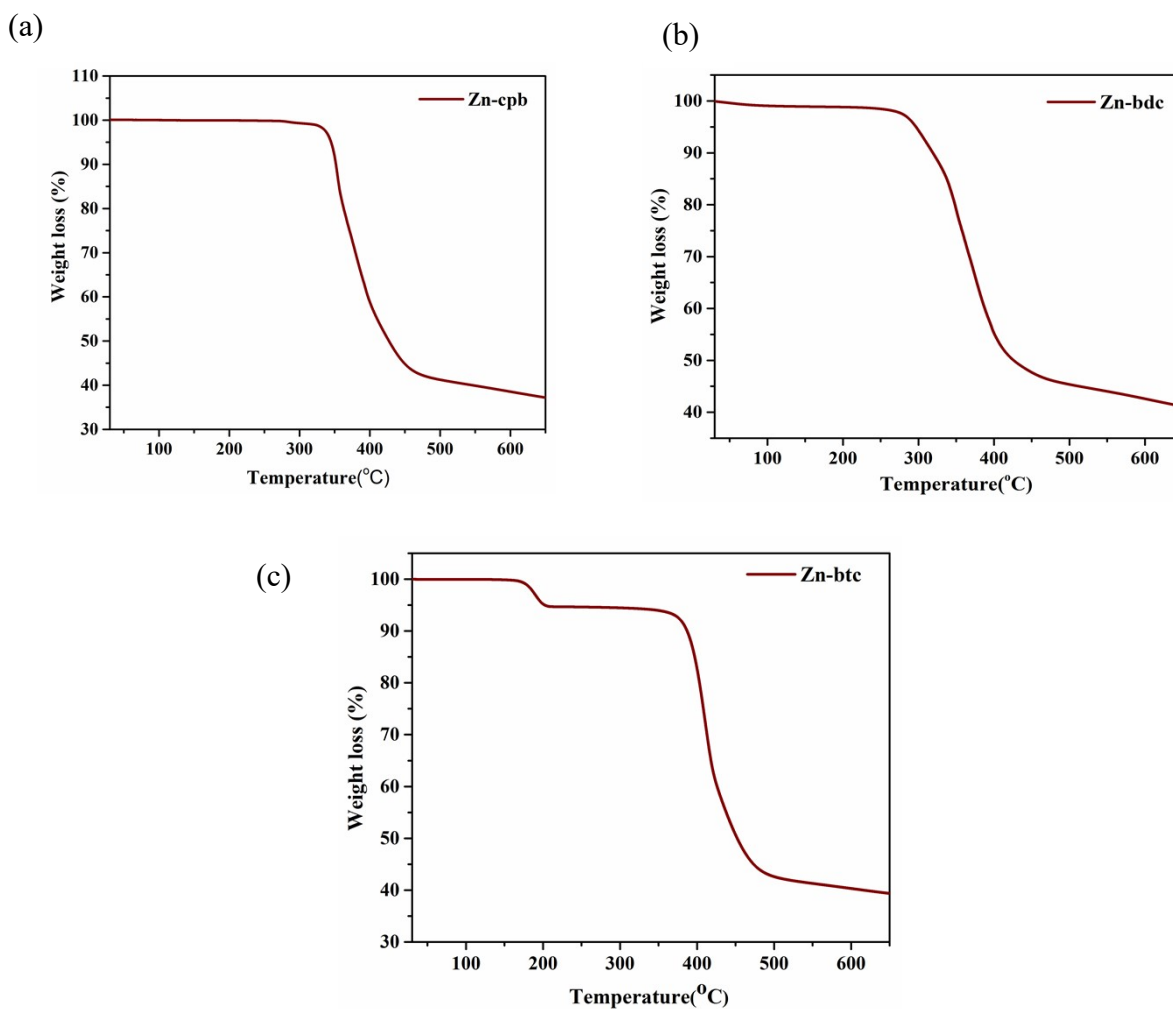

## Section S8: UV-Visible spectral analysis.

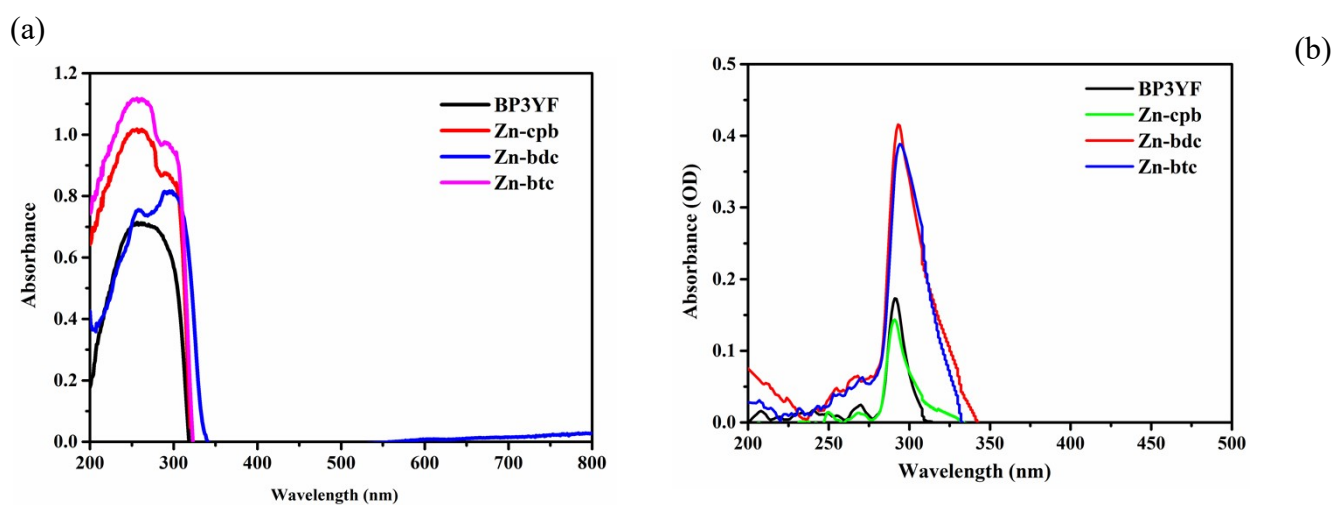

## Section S9: Photoluminescence (PL) study

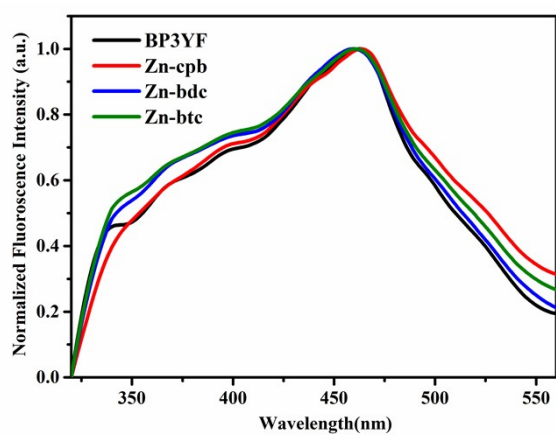

Figure S8. Solid-state emission spectra of ligand and MOFs.

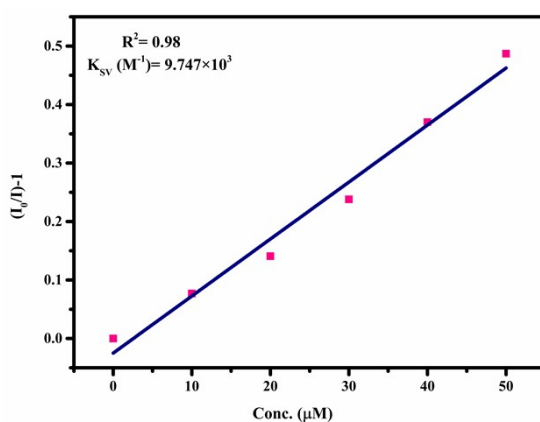

Figure S9. S-V plot of Zn-bdc for turn-off

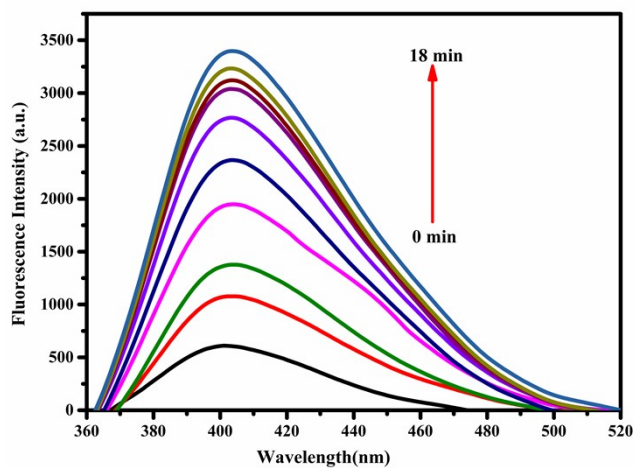

Figure S10 Time-dependent fluorescence spectra of Zn-bdc.

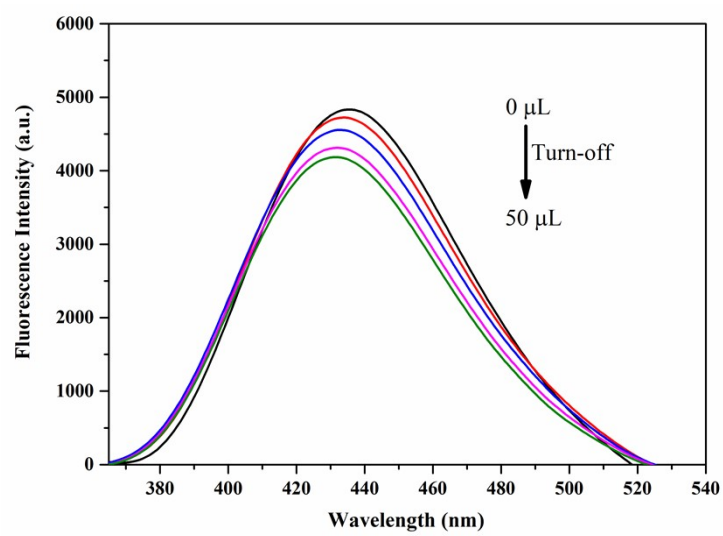

**Figure S11.** Concentration-dependent fluorescence turn-off response of **Zn-btc** upon addition of H<sub>2</sub>S up to 50 μL

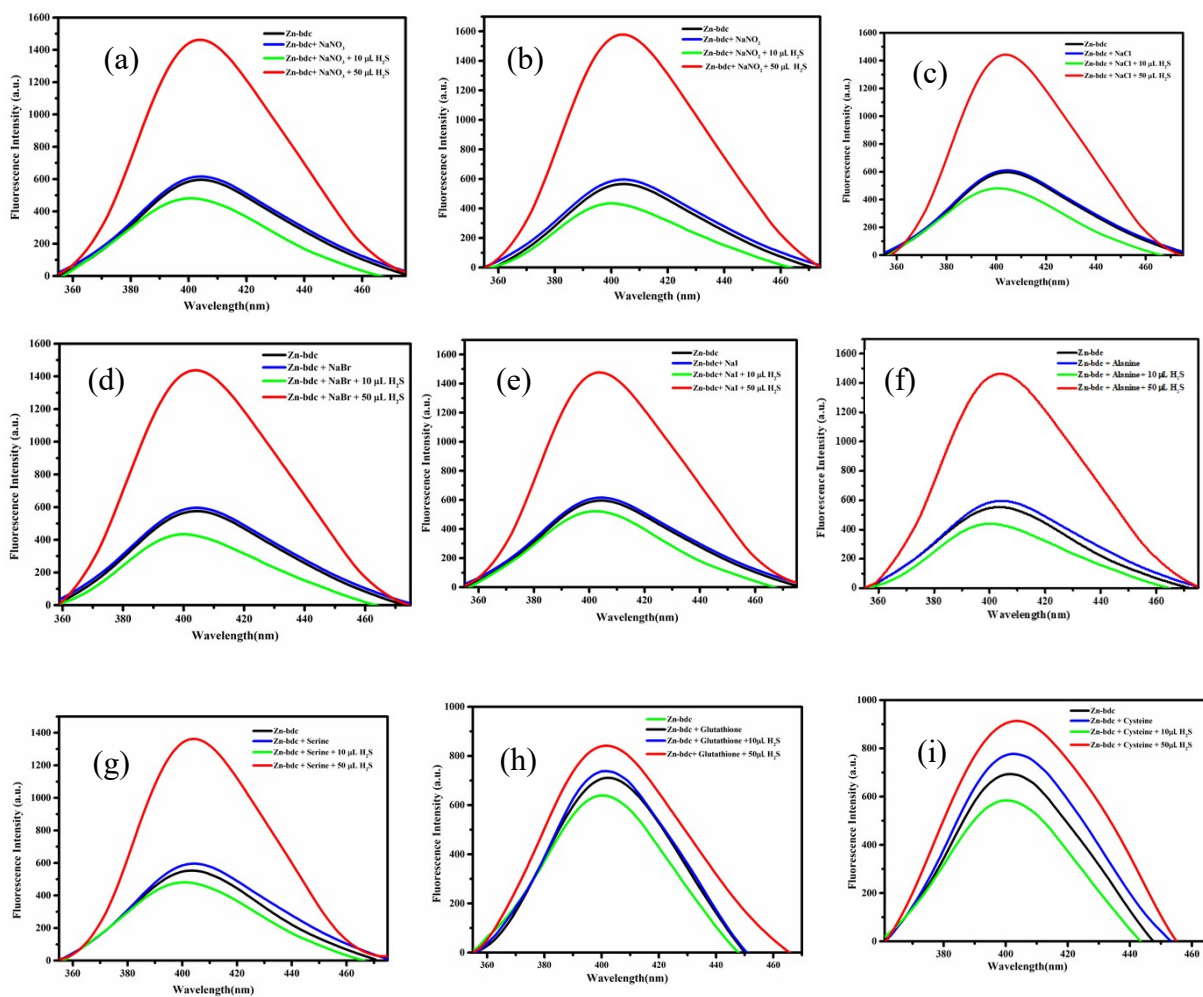

**Figure S12.** Fluorescence spectra upon addition of different analytes: (a)  $\text{NaNO}_3$ ; (b)  $\text{NaNO}_2$  (c)  $\text{NaCl}$ ; (d)  $\text{NaBr}$ ; (e)  $\text{NaI}$ ; (f) Alanine; (g) Serine; (h). Glutathione; (i) Cysteine

## Section S10: Characterization of H<sub>2</sub>S-treated material

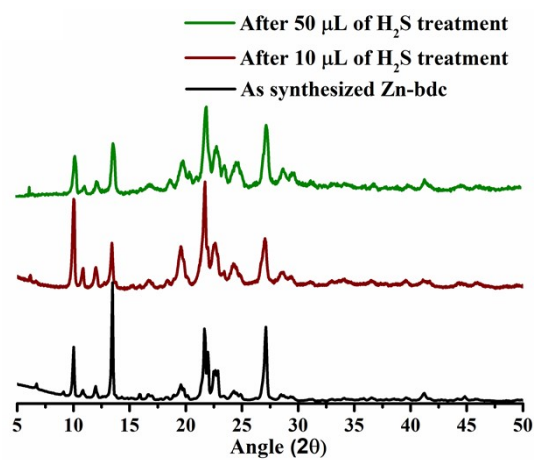

Figure S13. XRPD-pattern of Zn-bdc before and after performing H<sub>2</sub>S treatment

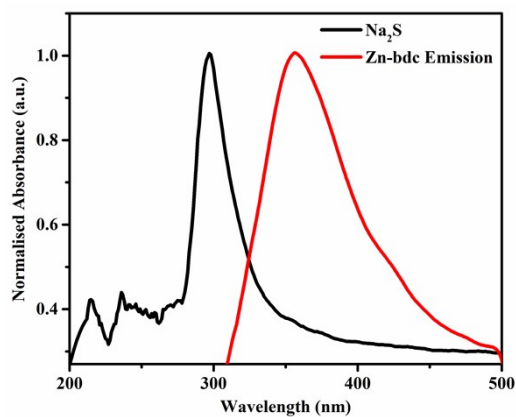

Figure S14. The UV-vis absorption of Na<sub>2</sub>S and emission spectrum of Zn-bdc.

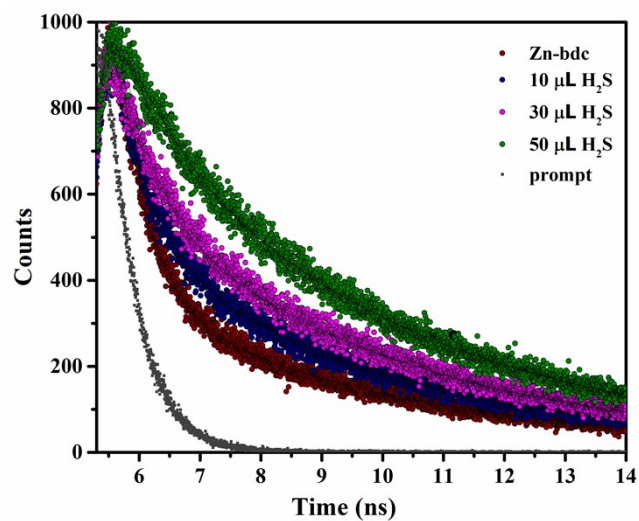

Figure S15. Fluorescence lifetime decay profile of Zn-bdc with incremental addition of H<sub>2</sub>S



**Table S3**Fluorescence lifetime data for **Zn-bdc** with H<sub>2</sub>S

| Amount added | $\tau_1$ [ns] | $\alpha_1$ | $\tau_2$ [ns] | $\alpha_2$ | $\tau_{av}$ [ns] |
|--------------|---------------|------------|---------------|------------|------------------|
| 0 equiv.     | 0.085         | 0.96       | 4.08          | 0.04       | 0.24             |
| 0.5 equiv.   | 0.084         | 0.94       | 4.07          | 0.06       | 0.32             |
| 1.5 equiv.   | 0.18          | 0.84       | 4.2           | 0.16       | 0.82             |
| 2.9 equiv.   | 0.39          | 0.56       | 4.28          | 0.44       | 2.10             |

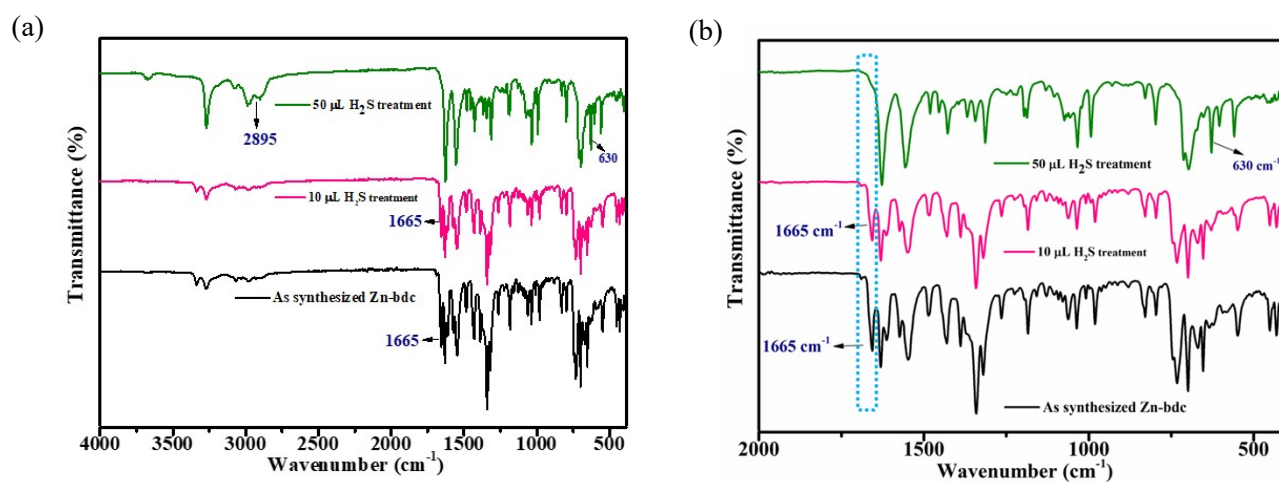

**Figure S16.** (a) FT-IR spectra of **Zn-bdc** before and after treatment with H<sub>2</sub>S. (b) Enlarge portion of FT-IR spectra of **Zn-bdc** before and after treatment with H<sub>2</sub>S.

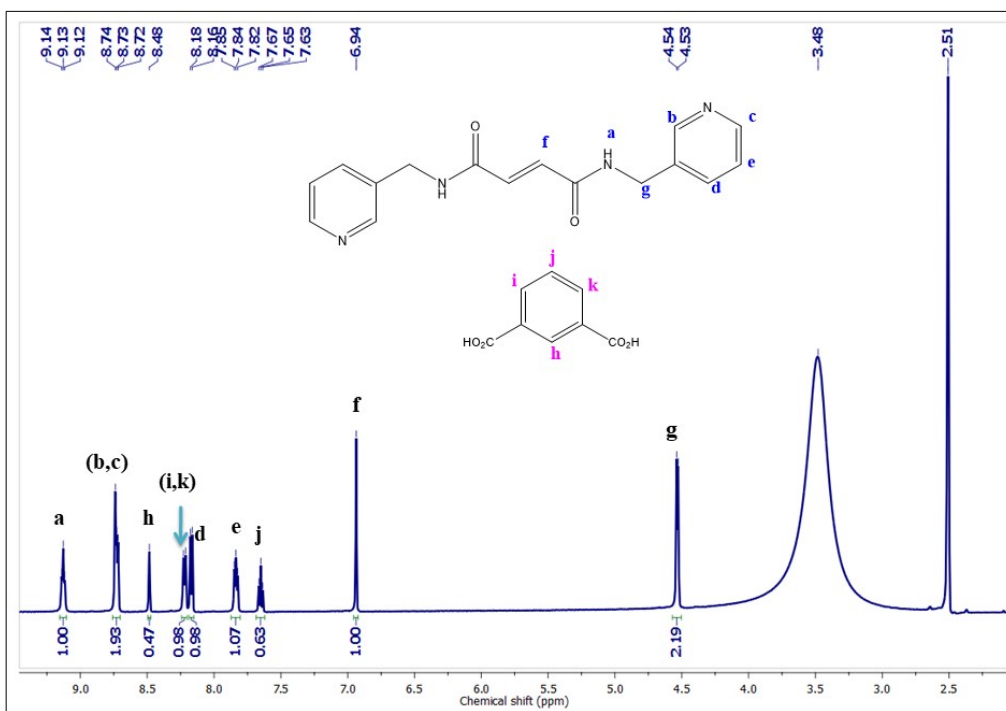

Figure S17.  $^1\text{H-NMR}$  spectra of **Zn-bdc** in  $\text{DMSO-d}_6$  (digested with  $\text{HCl}$ ).

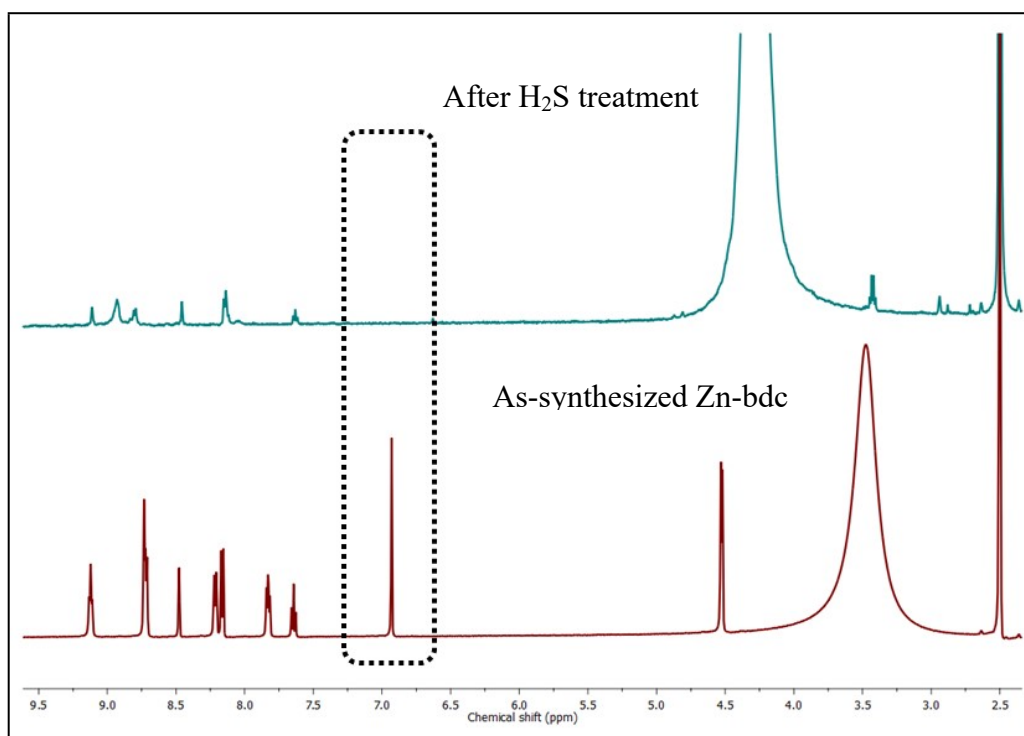

Figure S18.  $^1\text{H-NMR}$  spectra of **Zn-bdc** before and after treating with  $\text{H}_2\text{S}$  in  $\text{DMSO-d}_6$  (digested with  $\text{HCl}$ ).

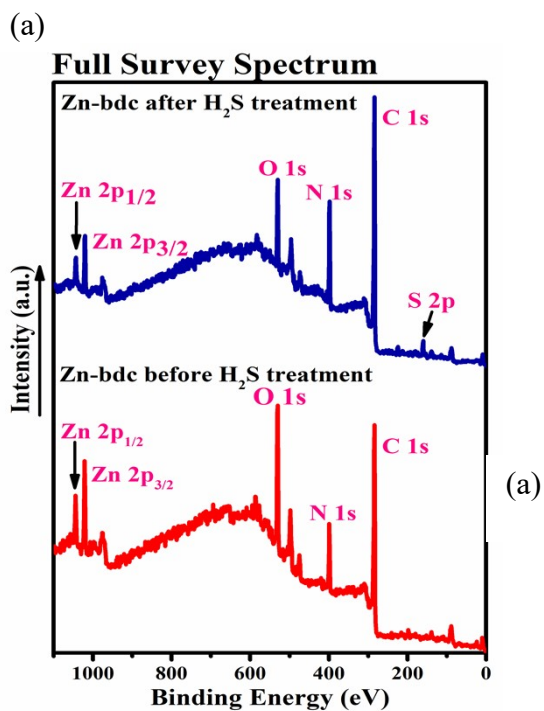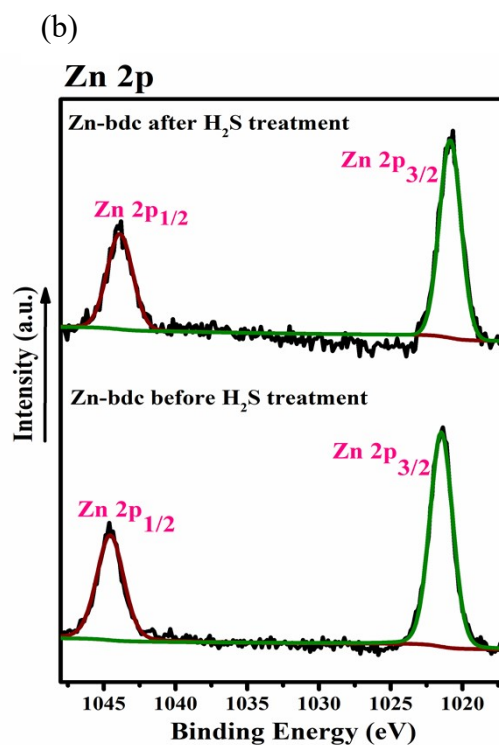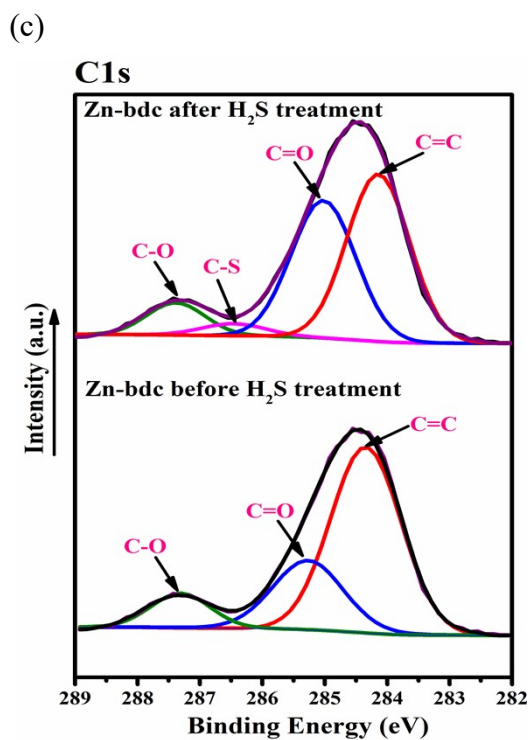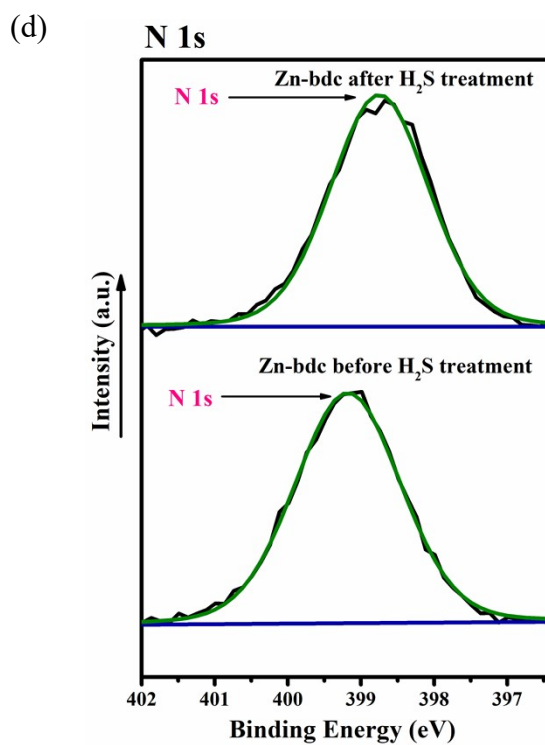

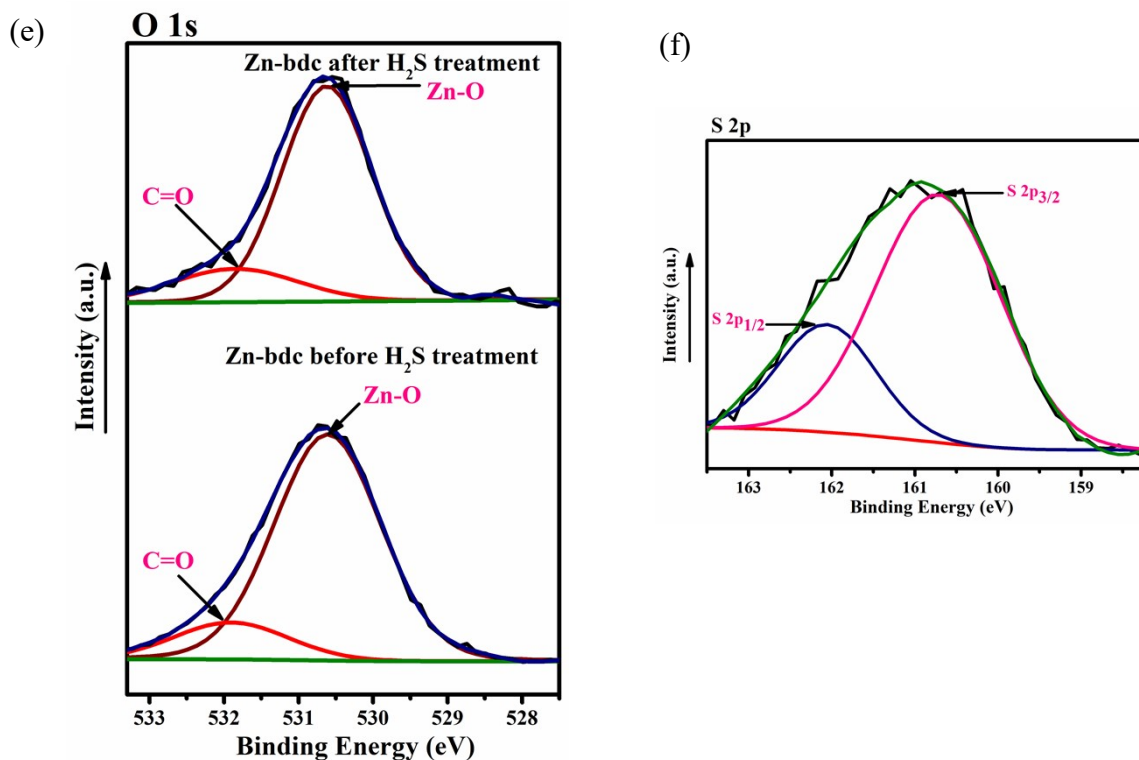

**Figure S19.** High-resolution XPS spectra of **Zn-bdc** before and after the addition of H<sub>2</sub>S; (a) full survey spectrum, (b) Zn 2p, (c) C 1s, (d) N1s (e) O1s and (f) S 2p for **Zn-bdc** after the addition of H<sub>2</sub>S.

## Section S11: Real water specimen investigation

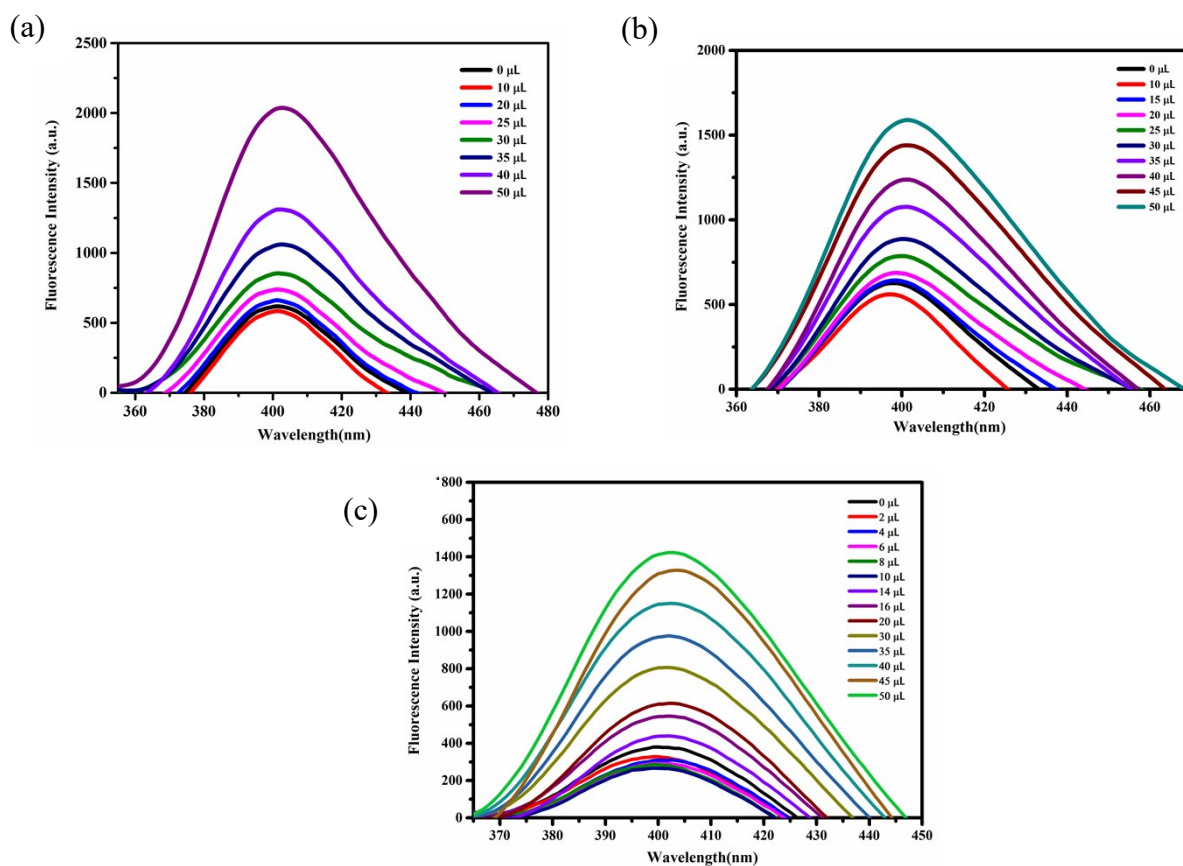

**Figure S20.** Change of the luminescence intensity spectra of **Zn-bdc** before and after the addition of **H<sub>2</sub>S** in (a) Tap water (b) Lake water (c) River water

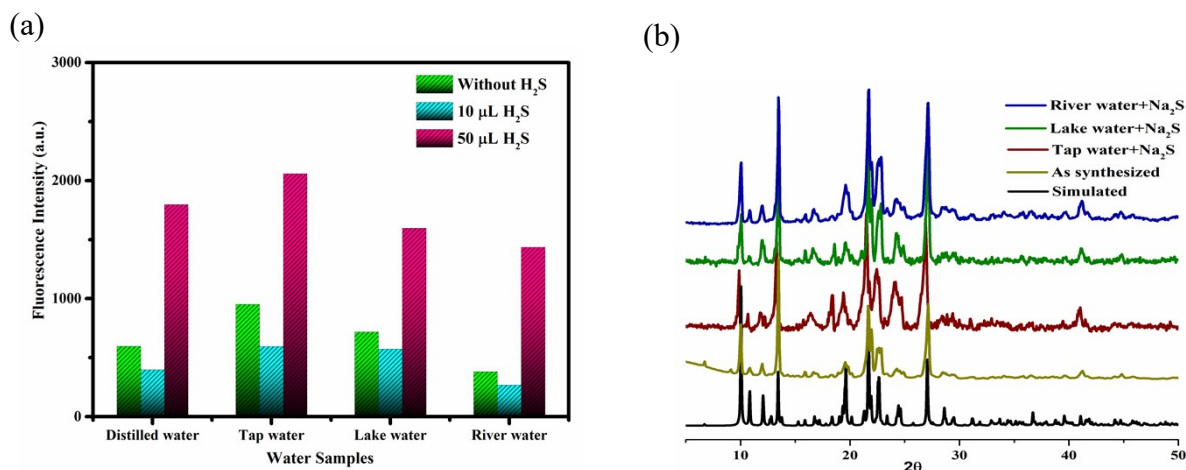

**Figure S21.** (a) Change of the luminescence intensity spectra of **Zn-bdc** in various water specimens before and after the addition of **H<sub>2</sub>S**. (b) XRPD pattern of **Zn-bdc** in tap water, lake water, and river water after the addition of **H<sub>2</sub>S**

## Section S12. Gaseous phase H<sub>2</sub>S detection in powder form

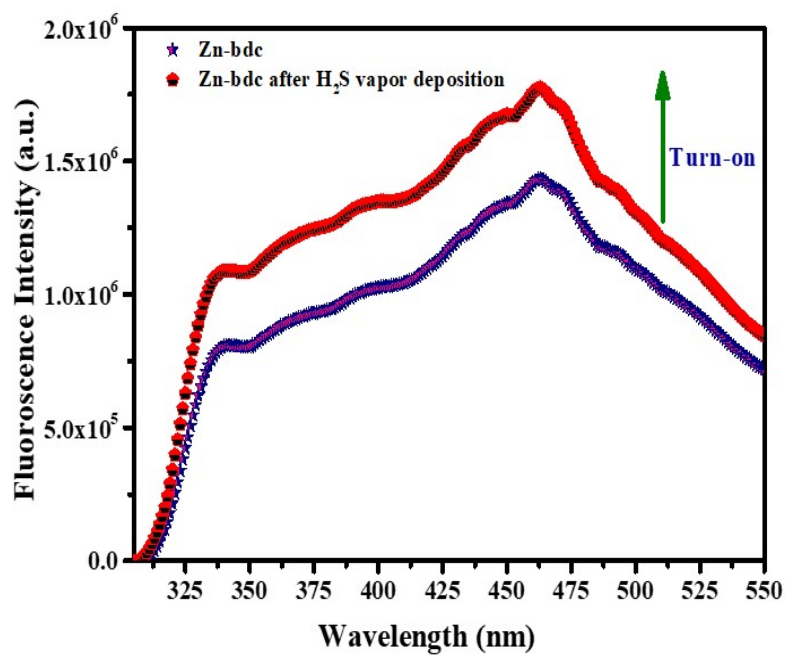

**Figure S22.** Change of the luminescence intensity spectra of Zn-bdc (a) before and after H<sub>2</sub>S vapor deposition in powder of Zn-bdc

### Section S13 Fluorescence spectra of MOF-loaded composite membrane

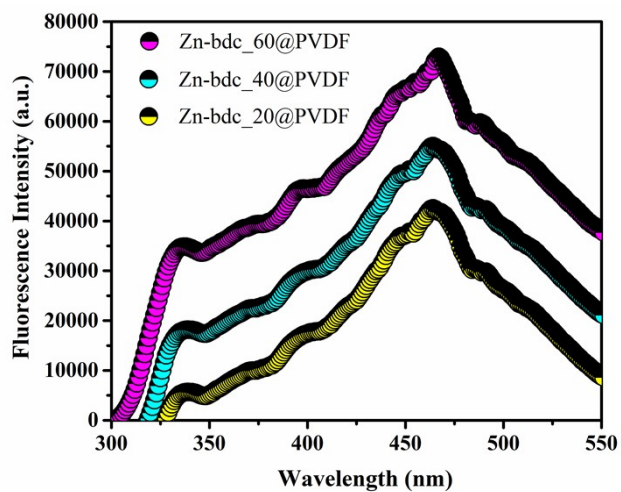

**Figure S23.** Change of the luminescence intensity spectra of Zn-bdc

## Section S14 Effect of H<sub>2</sub>S on the ligand

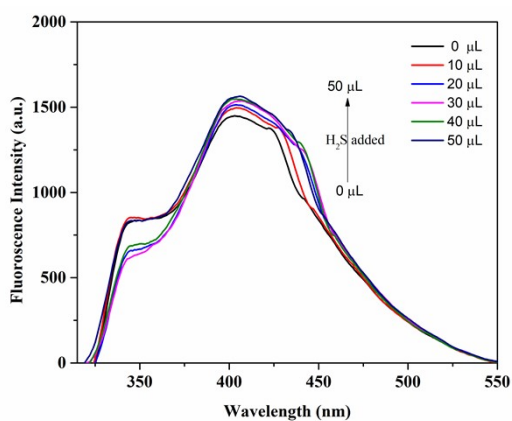

Figure S24. Titration of ligand BP3YF with H<sub>2</sub>S

## Section S15. Colorimetric response of the MOF and its thin-film toward the H<sub>2</sub>S study

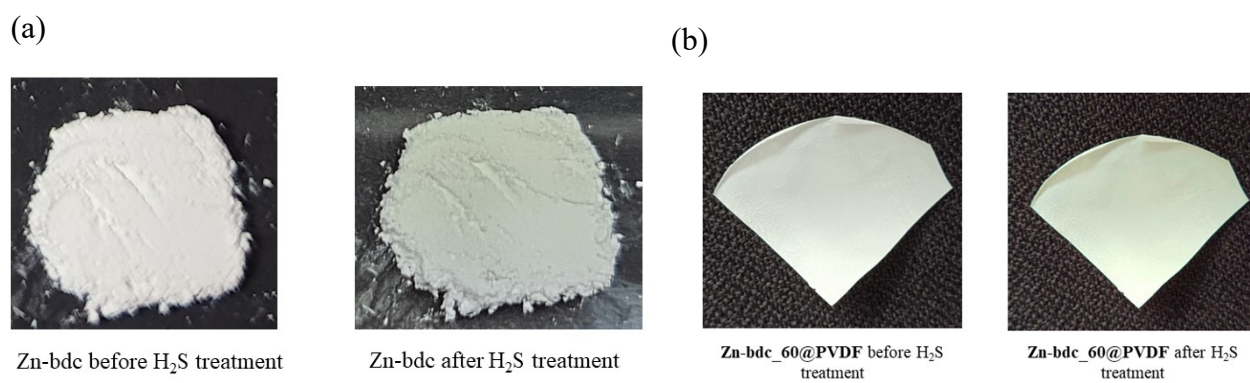

Figure S25. (a) colorimetric response of Zn-bdc MOF before and after H<sub>2</sub>S treatment; (b) colorimetric response of Zn-bdc\_60@PVDF before and after H<sub>2</sub>S treatment

## Section S16: Geometrical parameters of hydrogen bonds

**Table S4**

| Complex       | Types         | Donor (D) | Acceptor (A) | H...A (Å)  | D...A (Å)  | D-H...A (°) |     |
|---------------|---------------|-----------|--------------|------------|------------|-------------|-----|
| <b>Zn-cpb</b> | N-H...O       | N4        | O6           | 2.00       | 2.816 (9)  | 159         |     |
|               |               | N2        | O2           | 1.98       | 2.826 (9)  | 170         |     |
|               | C-H...O       | C7        | O7           | 2.46       | 3.154 (10) | 132         |     |
|               |               | C15       | O5           | 2.55       | 3.226 (11) | 130         |     |
|               |               | C16       | O5           | 2.45       | 3.325 (10) | 156         |     |
|               |               | C19       | O8           | 2.42       | 3.018 (9)  | 122         |     |
|               |               | C23       | O5           | 2.41       | 3.030 (9)  | 124         |     |
|               |               | C25       | O2           | 2.46       | 3.317 (10) | 153         |     |
|               |               | C26       | O6           | 2.36       | 3.216 (11) | 152         |     |
|               | C28           | O7        | 2.40         | 2.806 (10) | 105        |             |     |
| C-H...N       | C23           | N4        | 2.49         | 2.854 (10) | 103        |             |     |
| <b>Zn-bdc</b> | N-H...O       | N3        | O2           | 2.30       | 3.15 (3)   | 177         |     |
|               |               | N4        | O7           | 2.07       | 2.93 (3)   | 176         |     |
|               |               | N7        | O1           | 2.12       | 2.98 (3)   | 171         |     |
|               |               | N10       | O6           | 2.27       | 3.14 (2)   | 177         |     |
|               | C-H...O       | C10       | O9           | 2.30       | 3.10 (2)   | 143         |     |
|               |               | C11       | O1           | 2.44       | 3.18 (3)   | 136         |     |
|               |               | C14       | O9           | 2.37       | 3.18 (2)   | 146         |     |
|               |               | C18       | O1           | 2.51       | 3.25 (3)   | 137         |     |
|               |               | C19       | O16          | 2.39       | 3.32 (4)   | 159         |     |
|               |               | C21       | O10          | 2.11       | 3.07 (4)   | 168         |     |
|               |               | C23       | O7           | 2.49       | 3.22 (3)   | 136         |     |
|               |               | C24       | O3           | 2.29       | 3.09 (2)   | 143         |     |
|               |               | C28       | O9           | 2.50       | 2.81 (2)   | 100         |     |
|               |               | C30       | O8           | 2.47       | 2.79 (2)   | 100         |     |
|               |               | C34       | O3           | 2.36       | 3.16 (3)   | 144         |     |
|               |               | C38       | O7           | 2.49       | 3.22 (3)   | 136         |     |
|               |               | C39       | O15          | 2.11       | 3.08 (4)   | 174         |     |
|               |               | C39       | O10          | 2.58       | 2.91 (4)   | 100         |     |
|               |               | C42       | O10          | 2.42       | 2.80 (4)   | 104         |     |
|               |               | C44       | O5           | 2.38       | 3.31 (4)   | 161         |     |
|               | C45           | O16       | 2.47         | 2.78 (3)   | 100        |             |     |
|               | C46           | O15       | 2.24         | 2.59 (5)   | 102        |             |     |
|               | C47           | O5        | 2.43         | 2.74 (3)   | 100        |             |     |
|               | C-H...N       | C13       | N3           | 2.52       | 2.83 (4)   | 100         |     |
|               |               | C14       | N4           | 2.56       | 2.91 (3)   | 103         |     |
|               |               | C34       | N7           | 2.49       | 2.86 (3)   | 103         |     |
|               |               | C49       | N10          | 2.53       | 2.84 (4)   | 100         |     |
|               | <b>Zn-btc</b> | N-H...O   | N2           | O4         | 1.92       | 2.827 (5)   | 155 |
|               |               | C-H...O   | C1           | O6         | 2.41       | 3.048 (6)   | 125 |
|               |               |           | C4           | O1         | 2.60       | 3.432 (7)   | 150 |
| C6            | O1            |           | 2.40         | 2.813 (6)  | 105        |             |     |



## Section S17. Cytotoxicity assay analysis

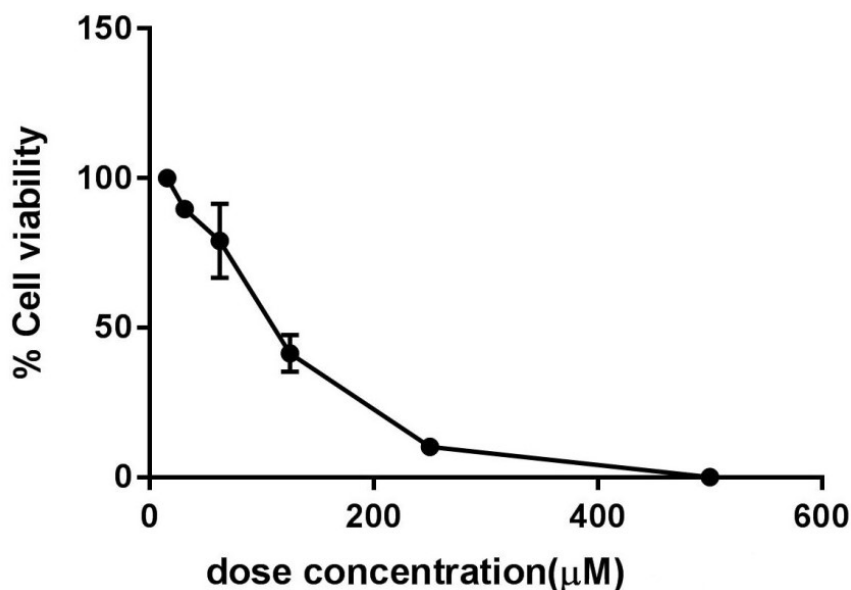

Figure S26. Cytotoxicity assay analysis of Zn-bdc

## Section S15:

### Comparison of the various existing MOFs for the sensing of H<sub>2</sub>S in solution phase

Table S5

| Entry | MOF used                                                    | Detection process       | Response time(sec) | Detecti on limit | Sensing medium | Analyte           | Ref. |
|-------|-------------------------------------------------------------|-------------------------|--------------------|------------------|----------------|-------------------|------|
| 1     | Eu-BDC-CH=CH <sub>2</sub>                                   |                         | <120               | 38.4 μM          | HEPES buffer   | NaHS              | S2   |
| 2     | CP-1<br>{[Zn(4-bmpbd)(AIP)].2H <sub>2</sub> O} <sub>n</sub> | Fluorescence 'turn-on'  | 30                 | 7.2 μM           | Water          | Na <sub>2</sub> S | S3   |
| 3     | Al-MIL-53-NO <sub>2</sub>                                   | Fluorescence 'turn-on'  | -                  | 69.3 μM          | Water          | NaHS              | S4   |
| 4     | CAU-10-V-H                                                  | Fluorescence 'turn-off' | 10                 | 1.65 μM          | HEPES buffer   | NaHS              | S5   |
| 5     | Cu <sup>2+</sup> /Eu <sup>3+</sup> /TFA@MIL-140C            | Fluorescence 'turn-on'  | 30                 | 7.43 μM          | HEPES buffer   | NaHS              | S6   |
| 6     | Al-MIL-53-N <sub>3</sub>                                    | Fluorescence 'turn-on'  | 180                | 0.09 μM          | HEPES buffer   | Na <sub>2</sub> S | S7   |

|    |                                                                                                   |                            |      |                           |                          |                              |     |
|----|---------------------------------------------------------------------------------------------------|----------------------------|------|---------------------------|--------------------------|------------------------------|-----|
| 7  | UiO-66-(NO <sub>2</sub> ) <sub>2</sub>                                                            | Fluorescence<br>'turn-on'  | 2400 | 14.14<br>μM               | HEPES<br>buffer          | Na <sub>2</sub> S            | S8  |
| 8  | Tb <sup>3+</sup> @CuI<br>CuI=[Cu(HCPOC) <sub>2</sub> ] <sub>n</sub>                               | Fluorescence<br>'turn-on'  | 120  | 1.2 μM                    | HEPES<br>buffer          | Na <sub>2</sub> S            | S9  |
| 9  | UiO-66-CH=CH <sub>2</sub>                                                                         | Fluorescence<br>'turn-off' | 10   | 6.46 μM                   | HEPES<br>buffer          | NaHS                         | S10 |
| 10 | [Zn(L)(4,4'-<br>bpy) <sub>0.5</sub> ](H <sub>2</sub> O) <sub>0.25</sub>                           | Fluorescence<br>'turn-off' | 150  | 7.9 μM                    | Water                    | Na <sub>2</sub> S            | S11 |
| 11 | [Cd <sub>4</sub> (L) <sub>4</sub> (4,4'-<br>bpy) <sub>2</sub> ](H <sub>2</sub> O) <sub>0.25</sub> | Fluorescence<br>'turn-off' | 65   | 0.2 μM                    | Water                    | Na <sub>2</sub> S            | S11 |
| 12 | CAU-10-N <sub>3</sub>                                                                             | Fluorescence<br>'turn-on'  | 900  | 2.65 μM                   | HEPES<br>buffer          | Na <sub>2</sub> S            | S12 |
| 13 | DUT-52-(NO <sub>2</sub> ) <sub>2</sub>                                                            | Fluorescence<br>'turn-on'  | 3300 | 20 μM                     | HEPES<br>buffer          | Na <sub>2</sub> S            | S13 |
| 14 | Eu <sup>3+</sup> /Cu <sup>2+</sup> @UiO-<br>66-(COOH)                                             | Fluorescence<br>'turn-on'  | 30   | 5.45 μM                   | HEPES<br>buffer          | NaHS                         | S14 |
| 15 | Ce-UiO-66-N <sub>3</sub>                                                                          | Fluorescence<br>'turn-on'  | 760  | 12.2 μM                   | HEPES<br>buffer          | NaHS                         | S15 |
| 16 | Ce-UiO-66-NO <sub>2</sub>                                                                         | Fluorescence<br>'turn-on'  | 760  | 34.8 μM                   | HEPES<br>buffer          | NaHS                         | S15 |
| 17 | Fe <sup>III</sup> -MIL-88-NH <sub>2</sub>                                                         | Fluorescence<br>'turn-on'  | -    | Fluorescence<br>'turn-on' | Water                    | NaHS                         | S16 |
| 18 | Al-MIL-101-N <sub>3</sub>                                                                         | Fluorescence<br>'turn-on'  | 120  | 100 nm                    | Water                    | Na <sub>2</sub> S            | S17 |
| 19 | IRMOF-3(-N <sub>3</sub> )                                                                         | Fluorescence<br>'turn-on'  | 90   | 28.3 μM                   | HEPES<br>buffer          | Na <sub>2</sub> S            | S18 |
| 20 | Zr-UiO-66-NO <sub>2</sub>                                                                         | Fluorescence<br>'turn-on'  | 460  | 188 μM                    | HEPES<br>buffer          | Na <sub>2</sub> S            | S19 |
| 21 | Zr-UiO-66-N <sub>3</sub>                                                                          | Fluorescence<br>'turn-on'  | 180  | 118 μM                    | HEPES<br>buffer          | Na <sub>2</sub> S            | S20 |
| 22 | CD-MONT-2'                                                                                        | Fluorescence<br>'turn-on'  | 900  | 0.058<br>μM               | PBS<br>buffer+<br>1%DMSO | Na <sub>2</sub> S            | S21 |
| 23 | {CuL[AlOH] <sub>2</sub> } <sub>n</sub>                                                            | Fluorescence<br>'turn-on'  | -    | 16 nM                     | BBS<br>butter            | NaHS                         | S22 |
| 24 | MN-ZIF-90                                                                                         | Fluorescence<br>'turn-on'  | -    | Not<br>specific<br>d      | Water                    | H <sub>2</sub> S<br>solution | S23 |
| 25 | BFMOF-1                                                                                           | Colorimetric<br>analysis   | 1800 | 17.6 μM                   | Water                    | H <sub>2</sub> S<br>solution | S24 |
| 26 | TP-MOF                                                                                            | Fluorescence<br>'turn-on'  | 3600 | 26.6 μM                   | HEPES<br>buffer          | NaHS                         | S25 |
| 27 | Eu <sup>3+</sup> /Ag <sup>+</sup> @UiO-66-                                                        | Fluorescence               | 30   | 23.53                     | HEPES                    | NaHS                         | S26 |

|    | (COOH) <sub>2</sub>                                                                             | Turn-off                                       |       | μM                        | buffer |                              |              |
|----|-------------------------------------------------------------------------------------------------|------------------------------------------------|-------|---------------------------|--------|------------------------------|--------------|
| 28 | UiO-66-NN-BQB                                                                                   | Fluorescence<br>'turn-on'                      | 18000 | 1.74 μM                   | Water  | H <sub>2</sub> S<br>solution | S27          |
| 29 | Fe <sub>x</sub> Al <sub>1-x</sub> MIL                                                           | Fluorescence<br>'turn-on'                      | 90    | 4.69 μM                   | Water  | NaHS                         | S28          |
| 30 | Cu-HIA                                                                                          | Fluorescence<br>'turn-on'                      | 30    | 0.21 μM                   | Water  | Na <sub>2</sub> S            | S29          |
| 31 | Eu <sup>3+</sup> /Cu <sup>2+</sup> @Znpda                                                       | Fluorescence<br>'turn-on'                      | 60    | 1.45 μM                   | HEPES  | NaHS                         | S30          |
| 32 | DUT-52-N <sub>3</sub>                                                                           | Fluorescence<br>'turn-on'                      | 120   | 0.5 μM                    | HEPES  | Na <sub>2</sub> S            | S31          |
| 33 | UiO-66-NO <sub>2</sub>                                                                          | Fluorescence<br>'turn-on'                      | <120  | 5.128<br>μM               | HEPES  | Na <sub>2</sub> S            | S32          |
| 33 | <b>Zn-bdc</b><br>{[Zn <sub>2</sub> (BP3YF) <sub>2</sub> (bdc<br>a) <sub>2</sub> ]} <sub>n</sub> | Fluorescence<br>'turn-off'<br>and<br>'turn-on' | 9     | 15.3<br>μM and<br>10.7 μM | Water  | Na <sub>2</sub> S            | This<br>work |

**Comparison of the various existing MOFs based mixed-matrix membrane by PVDF for the sensing of H<sub>2</sub>S**

**Table S6**

| Ent ry | MOF used                                  | Type of material      | Detection process         | Detectio n limit | Sensing mediu m | Reaction strategie s           | Ref.      |
|--------|-------------------------------------------|-----------------------|---------------------------|------------------|-----------------|--------------------------------|-----------|
| 1.     | Zn-bdc_60@PVDF                            | Mixed-matrix membrane | fluorescence<br>'turn-on' | 5.3 μM           | Gas             | Nucleophilic addition reaction | This work |
| 2.     | Al-MIL-53-NO <sub>2</sub><br>MMM (70 wt%) | MOF MMM               | fluorescence<br>'turn-on' | 92.31<br>nM      | Gas             | Reductive reaction             | S33       |

## References:

- S1. L. Rajput, S. Singha and K. Biradha, *Cryst. Growth Des.*, 2007, **7**, 2788.
- S2. X. Han, J. Liu, K. Yu, Y. Lu, W. Xiang, D. Zhao and Y. He, *Inorg. Chem.*, 2022, **61**, 5067.
- S3. S. Saha, P. K. Roy, K. Maity, M. Mandal and K. Biradha, *Chem. Eur. J.*, 2021, **28**, e202103830.
- S4. Z. Zhu, X. He and W. –N. Wang, *CrystEngComm.*, 2020, **22**, 195.
- S5. S. Nandi, H. Reinsch and S. Biswas, *Microporous and Mesoporous Materials.*, 2020, **293**, 109790.
- S6. Z. Wang, X. Wang, J. Li, W. Li and G. Li., *Journal of Inorganic and Organometallic Polymers and Materials.*, 2019, **29**, 2124.
- S7. A. Das, S. Banesh, V. Trivedi and S. Biswas, *Dalton Trans.*, 2018, **47**, 2690.
- S8. S. Nandi, S. Banesh, V. Trivedi and S. Biswas, *Analyst.* 2018, **143**, 1482.
- S9. X. Zheng, R. Fan, Y. Song, A. Wang, K. Xing, X. Du, P. Wang and Y. Yang, *J. Mater. Chem. C.* **2017**, **5**, 9943.
- S10. Y. Li, X. Zhang, L. Zhang, K. Jiang, Y. Cui, Y. Yang and G. Qian, *Journal of Solid state Chemistry.* 2017, **255**, 97.
- S11. X. –F. Yang, H. –B. Zhu and M. Liu, *Inorganic Chimica Acta.*, 2017, **466**, 410.
- S12. S. Nandi, H. Reinsch, S. Banesh, N. Stock, V. Trivedi and S. Biswas, *Dalton Trans.*, 2017, **46**, 12856.
- S13. R. Dalapati, S. N. Balaji, V. Trivedi, L. Khamari, S. Biswas, *Sensors and Actuators B.*, 2017, **245**, 1039.
- S14. X. Zhang, Q. Hu, T. Xia, J. Zhang, Y. Yang, Y. Cui, B. Chen and G. Qian, *ACS Appl. Mater. Interfaces.*, 2016, **8**, 32259.
- S15. A. Buragohain and S. Biswas, *CrystEngComm.*, 2016, **18**, 4374.
- S16. Y. –Y. Cao, X. –F. Guo and H. Wang, *Sensors and Actuators B.*, 2017, **243**, 8.
- S17. A. Legrand, A. Pastushenko, V. Lysenko, A. Geloën, E. A. Quadrelli, J. Canivet and D. Farrusseng, *ChemNanoMat.*, 2016, **2**, 866.
- S18. X. Zhang, J. Zhang, Q. Hu, Y. Cui, Y. Yang and G. Qian, *Applied Surface Science.*, 2015, **355**, 814.
- S19. S. S. Nagarkar, A. V. Desai, S. K. Ghosh, *Chem. Eur. J.*, 2015, **21**, 9994.
- S20. S. S. Nagarkar, T. Saha, A. V. Desai, P. Talukdar and S. K. Ghosh, *Sci. Rep.*, 2014, **4**, 7053.
- S21. X. Xin, J. Wang, C. Gong, H. Xu, R. Wang, S. Ji, H. Dong, Q. Meng, L. Zhang, F. Dai and D. Sun, *Sci. Rep.*, 2016, **6**, 21951.
- S22. Y. Ma, H. Su, X. Kuang, X. Li, T. Zhang and B. Tang, *Anal. Chem.*, 2014, **86**, 11459.
- S23. H. Li, X. Feng, Y. Guo, D. Chen, R. Lui, X. Ren, X. Jiang, Y. Dong and B. Wang, *Sci. Rep.*, 2014, **4**, 4366.
- S24. J. Cui, Y. –L. Wong, M. Zeller, A. D. Hunter and Z. Xu, *Angew. Chem. Int. Ed.*, 2014, **53**, 14438.
- S25. C. Yang, K. Chen, M. Chen, X. Hu, S. –Y. Huan, L. Chen, G. Song and X. –B. Zhang, *Anal. Chem.*, 2019, **91**, 2727.

- S26. X. Zhang, L. Fang, K. Jiang, H. He, Y. Yang, Y. Cui, B. Li and G. Qian, *Biosensors And Bioelectronics.*, 2019, **130**, 65.
- S27. H. Yu, C. Liu, Y. Li and A. Huang, *ACS Appl. Mater. Interfaces* **2019**, *11*, 41972-41978.
- S28. Z. Zhu, V. Natarajan and W. -N. Wang, *Journal of Solid state Chemistry.*, 2020, **288**, 121434.
- S29. X. Zhao, L. Zhang, J. Bai, P. Wu, Y. Li, L. Liang, L. Xie and J. Wang, *Spectrochimica Acta Part A: Molecular and Biomolecular Spectroscopy.*, 2020, **243**, 118794.
- S30. X. Han, C. Gu, Y. Ding, J. Yu, K. Li, D. Zhao and B. Chen, *ACS Appl. Mater. Interfaces.*, 2021, **13**, 20371.
- S31. C. Gogoi, A. Kumar, M. SK, S. Biswas, *Microporous and Mesoporous Materials.*, 2021, **311**, 110725.
- S32. K. Yu, Q. Wang, Z. Li, Z. Xin, X. Han, T. Alshahrani, Y. He, D. Zhao and B. Chen, *Microporous and Mesoporous Materials.*, 2023, **356**, 112594.
- S33. X. Zhang, Q. Zhang, D. Yue, J. Zhang, J. Wang, B. Li, Y. Yang, Y. Cui and G. Qian, *Small.*, 2018, *14*, 1801563.
